# Supplementary material for: Struggle hours for endless demands: When a child with obsessive-compulsive disorder wears parents down?
Source: Research Square preprint supplement (doi:10.21203/rs.3.rs-7604032/v1), 2025-10-13
Supplement: Supplementary file 1 [file 8f3245aa472c813aedce6d6e.xlsx]

## Sheet: Table1
	Tabel 1: Descriptive and clinical data for the OCD group
				Mean	SD	N
	Demographic	Age (6-15 years old)		11.46	2.27	136
		Siblings		1.45	1.14	136
	Sleep dulation	Weekday		7.57	2.32	136
		Holiday		8.98	1.96	136
	Psychological scales	DSRS		14.54	7.47	136
		ODBI		18.24	13.14	136
		SCAS	Separative anxiety	6.92	5.17	136
			Social phobia	7.03	4.76	136
			OCD	8.49	4.47	136
			Panic symptoms	6.14	6.36	136
			General anxiety	5.49	3.49	136
			Traumatic symptoms	7.05	4.77	136
			Total score	41.11	23.45	136
				N	Parcentage	N
	Psychosocial context	School refusal		63	0.467	136
		Domestic Violence		15	0.111
		Suicidal ideation		8	0.111	179
