# Supplementary material for: Struggle hours for endless demands: When a child with obsessive-compulsive disorder wears parents down?
Source: Research Square preprint supplement (doi:10.21203/rs.3.rs-7604032/v1), 2025-10-13
Supplement: Supplementary file 2 [file c64c0ce99d0c9e99f695bbf5.xlsx]

## Sheet: Table2
				Total Score				Morning				School				AfterSchool				Evening				Night				All Behavior
				Coefficient	95% CI	p-value		Coefficient	95% CI	p-value		Coefficient	95% CI	p-value		Coefficient	95% CI	p-value		Coefficient	95% CI	p-value		Coefficient	95% CI	p-value		Coefficient	95% CI	p-value
	Intercept			-0.18				-0.18				-0.18				-0.18				-0.18				-0.18				-0.18
	Demographic	Age (6-15 years old)		0.019	-0.19 to 0.23	0.857		-0.04	-0.25 to 0.17	0.707		-0.084	-0.301 to 0.134	0.449		0	-0.30 to 0.13	0.998		0.068	-0.15 to 0.29	0.537		0.043	-0.17 to 0.26	0.69		0.123	-0.08 to 0.33	0.228
		Seex		-0.045	-0.24 to 0.15	0.656		-0.133	-0.33 to 0.06	0.182		-0.058	-0.261 to 0.144	0.568		0.127	-0.26 to 0.14	0.237		-0.014	-0.22 to 0.19	0.888		-0.045	-0.24 to 0.15	0.648		-0.045	-0.23 to 0.14	0.633
		Number of Siblings(0-4)		-0.131	-0.32 to 0.06	0.172		-0.189	-0.38 to -0.00	0.047		-0.041	-0.234 to 0.152	0.674		-0.07	-0.23 to 0.15	0.492		-0.113	-0.31 to 0.08	0.249		-0.041	-0.23 to 0.15	0.666		-0.113	-0.29 to 0.07	0.209
	Sleep dulation	Weekday		0.133	-0.11 to 0.37	0.276		0.099	-0.14 to 0.34	0.413		0.127	-0.119 to 0.373	0.307		0.022	-0.12 to 0.37	0.866		0.194	-0.05 to 0.44	0.123		0.048	-0.19 to 0.29	0.69		0.082	-0.14 to 0.31	0.476
		Holiday		-0.139	-0.38 to 0.10	0.256		-0.24	-0.48 to -0.00	0.049		-0.135	-0.382 to 0.112	0.281		0.068	-0.38 to 0.11	0.605		-0.081	-0.33 to 0.17	0.517		-0.117	-0.36 to 0.12	0.335		-0.073	-0.30 to 0.16	0.529
	Psychological scales	DSRS		0.189	-0.10 to 0.48	0.194		0.1	-0.18 to 0.38	0.488		0.105	-0.188 to 0.398	0.48		0.23	-0.19 to 0.40	0.139		0.095	-0.20 to 0.39	0.524		0.131	-0.15 to 0.42	0.365		0.251	-0.02 to 0.52	0.069
		ODBI		0.165	-0.02 to 0.35	0.078		0.281	0.10 to 0.46	0.003		0.086	-0.101 to 0.274	0.364		-0.006	-0.10 to 0.27	0.954		0.273	0.09 to 0.46	0.005		-0.121	-0.30 to 0.06	0.194		0.164	-0.01 to 0.34	0.064
		SCAS	Separative anxiety	0.192	-0.11 to 0.50	0.213		0.097	-0.20 to 0.40	0.523		0.125	-0.186 to 0.436	0.426		0.011	-0.19 to 0.44	0.948		0.177	-0.14 to 0.49	0.262		0.237	-0.07 to 0.54	0.124		0.234	-0.05 to 0.52	0.109
			Social phobia	0.032	-0.28 to 0.34	0.84		-0.05	-0.36 to 0.26	0.748		0.099	-0.218 to 0.416	0.537		0.107	-0.22 to 0.42	0.523		0.087	-0.23 to 0.41	0.588		-0.058	-0.37 to 0.25	0.709		-0.042	-0.34 to 0.25	0.778
			OCD	-0.091	-0.33 to 0.15	0.459		0.102	-0.14 to 0.34	0.402		-0.173	-0.421 to 0.075	0.169		-0.125	-0.42 to 0.07	0.343		-0.123	-0.37 to 0.13	0.331		-0.03	-0.27 to 0.21	0.806		-0.114	-0.34 to 0.12	0.327
			Panic symptoms	0.104	-0.23 to 0.44	0.541		0.029	-0.31 to 0.36	0.864		0.138	-0.208 to 0.483	0.431		-0.002	-0.21 to 0.48	0.991		-0.054	-0.40 to 0.29	0.76		0.228	-0.11 to 0.56	0.182		0.194	-0.13 to 0.51	0.231
			General anxiety	0.145	-0.12 to 0.41	0.27		0.081	-0.18 to 0.34	0.533		0.118	-0.147 to 0.384	0.38		0.06	-0.15 to 0.38	0.67		0.124	-0.14 to 0.39	0.359		0.121	-0.14 to 0.38	0.355		0.167	-0.08 to 0.41	0.181
			Traumatic symptoms	-0.22	-0.60 to 0.16	0.249		-0.11	-0.48 to 0.26	0.561		-0.179	-0.564 to 0.206	0.358		-0.093	-0.56 to 0.21	0.647		-0.118	-0.50 to 0.27	0.548		-0.208	-0.58 to 0.17	0.274		-0.352	-0.71 to 0.00	0.052
			Total score	0.037	-0.02 to 0.10	0.216		0.028	-0.03 to 0.09	0.333		0.033	-0.026 to 0.093	0.272		-0.01	-0.03 to 0.09	0.743		0.013	-0.05 to 0.07	0.659		0.072	0.01 to 0.13	0.015		0.027	-0.03 to 0.08	0.331
	Psychosocial context	Suicide Ideation		-0.002	-0.21 to 0.20	0.982		0.025	-0.18 to 0.23	0.811		0.002	-0.207 to 0.212	0.981		-0.078	-0.21 to 0.21	0.481		0.01	-0.20 to 0.22	0.922		-0.073	-0.28 to 0.13	0.477		0.118	-0.07 to 0.31	0.228
		Domestic violence		0.204	0.01 to 0.40	0.042		0.049	-0.14 to 0.24	0.615		0.224	0.024 to 0.425	0.029		0.22	0.02 to 0.42	0.041		0.171	-0.03 to 0.37	0.096		0.094	-0.10 to 0.29	0.341		0.214	0.03 to 0.40	0.024
		School refusal		-0.111	-0.30 to 0.08	0.257		-0.226	-0.42 to -0.04	0.021		-0.015	-0.212 to 0.183	0.884		-0.084	-0.21 to 0.18	0.421		-0.076	-0.27 to 0.12	0.449		0.054	-0.14 to 0.25	0.578		-0.139	-0.32 to 0.04	0.133
	• Sibling indicates the total number of siblings.
